# Supplementary material for: Microsomal prostaglandin E synthase-1 in both cancer cells and hosts contributes to tumour growth, invasion and metastasis
Source: PubMed Central journal article supplement — Biochem J. 2009 Dec 23;425(Pt 2):361–71. doi: 10.1042/BJ20090045 (PMC2825730; doi:10.1042/bj20090045), 2009-12-23
Supplement: bj4250361add.pdf [file bj4250361add.pdf]

## SUPPLEMENTARY ONLINE DATA

**Microsomal prostaglandin E synthase-1 in both cancer cells and hosts contributes to tumour growth, invasion and metastasis**

Daisuke KAMEI\*<sup>†</sup>, Makoto MURAKAMI\*<sup>‡§</sup>, Yuka SASAKI\*, Yoshihito NAKATANI\*, Masataka MAJIMA<sup>||</sup>, Yukio ISHIKAWA<sup>¶</sup>, Toshiharu ISHII<sup>¶</sup>, Satoshi UEMATSU\*\*\*, Shizuo AKIRA\*\*, Shuntaro HARA\*<sup>1</sup> and Ichiro KUDO\*<sup>2</sup>

\*The Department of Health Chemistry, School of Pharmacy, Showa University, 1-5-8 Hatanodai, Shinagawa-ku, Tokyo 142-8555, Japan, <sup>†</sup>Department of Research and Development for Innovative Medical Needs, School of Pharmacy, Showa University, 1-5-8 Hatanodai, Shinagawa-ku, Tokyo 142-8555, Japan, <sup>‡</sup>Tokyo Metropolitan Institute of Medical Science, 2-1-6 Kanikitazawa, Setagaya-ku, Tokyo 156-8506, Japan, <sup>§</sup>PRESTO, Japan Science and Technology Agency, 4-1-8 Honcho Kawaguchi, Saitama 332-0012, Japan, <sup>||</sup>Department of Pharmacology, School of Medicine, Kitasato University, 1-15-1 Kitasato, Sagami-hara, Kanagawa 228-8555, Japan, <sup>¶</sup>Department of Pathology, School of Medicine, Toho University, 5-21-16 Omori-Nishi, Ohta-ku, Tokyo 143-8540, Japan, and \*\*\*Department of Host Defense, Research Institute for Microbial Diseases, Osaka University, 3-1 Yamada-oka, Suita, Osaka 565-0871, Japan

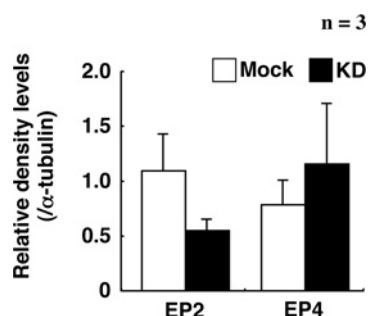

**Figure S1** Reduced expression level of EP2 protein in mPGES-1-silenced LLC cells *in vitro*

Expression of EP2 and EP4 in mPGES-1-KD and control (mock) cells was assessed by immunoblotting. Representative results of at least three experiments are shown. On Western blot analysis the expression levels of EP2 and EP4 protein were quantified by a densitometer, with the expression level of  $\alpha$ -tubulin used for normalization (means  $\pm$  S.D.,  $n = 3$ ).

Received 8 January 2009/8 October 2009; accepted 21 October 2009  
Published as BJ Immediate Publication 21 October 2009, doi:10.1042/BJ20090045

<sup>1</sup> To whom correspondence should be addressed (email haras@pharm.showa-u.ac.jp).

<sup>2</sup> Professor Kudo died on April 27, 2008. We greatly miss him as a scientist and a friend. We offer sincere thanks to all the friends, colleagues and former collaborators of Professor Kudo who showed him kindness during his lifetime.
